# Supplementary material for: Nitrogen restricts future treeline advance in the sub-arctic
Source: Copernicus journal article supplement (doi:10.5194/bg-2021-169), 2021-06-28
Supplement: Supplementary file 1 [file bg-2021-169-supplement-version3.zip]

Archive with 2 entries (2 files):
- S1 Additional figures.pdf
- S2 Additional tables.pdf
