# Supplementary material for: Nitrogen restricts future treeline advance in the sub-arctic
Source: Copernicus journal article supplement (doi:10.5194/bg-2021-169), 2021-06-28
Supplement: Supplementary file 1 [file bg-2021-169-supplement-version3.zip › S2 Additional tables.pdf]

Table S2.1. Plant Functional Types (PFTs) simulated in the study.

| PFT                                                                 | Typical species                                                                                                                    |
|---------------------------------------------------------------------|------------------------------------------------------------------------------------------------------------------------------------|
| <b>BNE</b><br>Boreal needle-leaved evergreen tree                   | <i>Picea abies</i>                                                                                                                 |
| <b>BINE</b><br>Boreal needle-leaved shade-intolerant evergreen tree | <i>Pinus sylvestris</i>                                                                                                            |
| <b>IBS</b><br>Boreal shade-intolerant broad-leaved summergreen tree | <i>Betula pubescens</i> ssp. <i>czerepanovii</i> ,<br><i>Alnus glutinosa</i> , <i>Sorbus aucuparia</i> ,<br><i>Populus tremula</i> |
| <b>HSS</b><br>Tall summergreen shrub                                | <i>Salix</i> spp.                                                                                                                  |
| <b>HSE</b><br>Tall evergreen shrub                                  | <i>Juniperus communis</i>                                                                                                          |
| <b>LSS</b><br>Low summergreen shrub                                 | <i>Vaccinium myrtillus</i> , <i>Salix hastata</i>                                                                                  |
| <b>LSE</b><br>Low evergreen shrub                                   | <i>Empetrum nigrum</i> , <i>Cassiope tetragona</i>                                                                                 |
| <b>SPDS</b><br>Prostrate summergreen dwarf shrub                    | <i>Saxifraga oppositifolia</i>                                                                                                     |
| <b>EPDS</b><br>Prostrate evergreen dwarf shrub                      | <i>Arctostaphylos uva-ursi</i>                                                                                                     |
| <b>GRS</b><br>Boreal C3 graminoids                                  | Gramineae                                                                                                                          |
| <b>CLM</b><br>Cushion-forb-lichen-moss-tunda                        | Cushion-forming <i>Caryophyllaceae</i><br>and <i>Saxifragaceae</i> , lichens, mosses                                               |

Table S2.2. Parameters for all simulated PFTs.  
Empty cells indicate that this parameter is not applied to the PFT while “-” indicates a no-limit value

[illegible]



Table S2.3 - Simulations performed in the study. Please refer to the main text for more information about global climate model (GCM) selection and model experiments

| Climate source                                                                                                                                                                                        | Simulation period | Climate scenario* | CO2 scenario**                           | N-dep scenario**                                                  |
|-------------------------------------------------------------------------------------------------------------------------------------------------------------------------------------------------------|-------------------|-------------------|------------------------------------------|-------------------------------------------------------------------|
| Historic simulations                                                                                                                                                                                  |                   |                   |                                          |                                                                   |
| Yang et al. (2011)                                                                                                                                                                                    | 1913-2000         | Historic          | Historic                                 | Historic                                                          |
| Projection Simulations                                                                                                                                                                                |                   |                   |                                          |                                                                   |
| Yang et al. (2011)                                                                                                                                                                                    | 2000 - 2100       | No trend          | Constant                                 | Constant                                                          |
| GFDL-ESM2M                                                                                                                                                                                            | 2000 - 2100       | RCP 2.6           | RCP 2.6                                  | RCP 2.6                                                           |
|                                                                                                                                                                                                       |                   | RCP 8.5           | RCP 8.5                                  | RCP 8.5                                                           |
| HadGEM2-AO                                                                                                                                                                                            | 2000 - 2100       | RCP 2.6           | RCP 2.6                                  | RCP 2.6                                                           |
|                                                                                                                                                                                                       |                   | RCP 8.5           | RCP 8.5                                  | RCP 8.5                                                           |
| MIROC-ESM-CHEM                                                                                                                                                                                        | 2000 - 2100       | RCP 2.6           | RCP 2.6                                  | RCP 2.6                                                           |
|                                                                                                                                                                                                       |                   | RCP 8.5           | RCP 8.5                                  | RCP 8.5                                                           |
| Climate change experiment                                                                                                                                                                             |                   |                   |                                          |                                                                   |
| GFDL-ESM2M                                                                                                                                                                                            | 2000 - 2100       | RCP 2.6           | Constant                                 | Constant                                                          |
|                                                                                                                                                                                                       |                   | RCP 8.5           |                                          |                                                                   |
| HadGEM2-AO                                                                                                                                                                                            | 2000 - 2100       | RCP 2.6           | Constant                                 | Constant                                                          |
|                                                                                                                                                                                                       |                   | RCP 8.5           |                                          |                                                                   |
| MIROC-ESM-CHEM                                                                                                                                                                                        | 2000 - 2100       | RCP 2.6           | Constant                                 | Constant                                                          |
|                                                                                                                                                                                                       |                   | RCP 8.5           |                                          |                                                                   |
| CO2 experiment                                                                                                                                                                                        |                   |                   |                                          |                                                                   |
| Yang et al. (2011)                                                                                                                                                                                    | 2000 - 2100       | No trend          | RCP 2.6<br>RCP 4.5<br>RCP 6.0<br>RCP 8.5 | Constant                                                          |
| Nitrogen deposition experiment                                                                                                                                                                        |                   |                   |                                          |                                                                   |
| Yang et al. (2011)                                                                                                                                                                                    | 2000 - 2100       | No trend          | Constant                                 | RCP 2.6<br>RCP 8.5<br>2x Ndep<br>5x Ndep<br>7.5x Ndep<br>10x Ndep |
| * No trend refers to extended climate dataset with climate sampled randomly from the period 1990-2000.<br>** Constant refers to values unchanged after year 2000 and throughout the projection period |                   |                   |                                          |                                                                   |
